# Supplementary material
Source: publisher figshare collection journal article supplement (https://karger.figshare.com/ndownloader/files/14606012)
Supplement: Supplementary file 1 [file 14606012]

**Supplementary Table 6.** Characteristics of neuron profiles in the medial forebrain bundle.

| PARAMETER | ANTIBODY | |
| --- | --- | --- |
| Area (µm2) | PV | GAD |
| Number | 30 | 6 |
| Mean | 80.28 | 112.54 |
| Standard deviation | 27.90 | 12.59 |
| Range | 49.56-178.23 | 102.06-129.24 |
| Perimeter (µm) |  |  |
| Number | 30 | 6 |
| Mean | 36.65 | 41.53 |
| Standard deviation | 7.04 | 2.26 |
| Range | 28.22-58.68 | 38.43-44.86 |
| Length (µm) |  |  |
| Number | 30 | 6 |
| Mean | 13.51 | 14.96 |
| Standard Deviation | 3.63 | 1.21 |
| Range | 9.52-24.69 | 13.16-16.80 |
| Width (µm) |  |  |
| Number | 30 | 6 |
| Mean | 7.55 | 9.82 |
| Standard deviation | 1.36 | 0.88 |
| Range | 5.64-11.52 | 8.76-11.22 |
| Eccentricity (Width/Length) |  |  |
| Number | 30 | 6 |
| Mean | 0.59 | 0.66 |
| Standard deviation | 0.16 | 0.08 |
| Range | 0.33-0.93 | 0.56-0.76 |
